# Supplementary material for: A Comparative Study of Non-Viral Gene Delivery Techniques to Human Adipose-Derived Mesenchymal Stem Cell
Source: PubMed Central journal article supplement (PMC4200830; doi:10.3390/ijms150915044), 2014-08-26
Supplement: ijms-15-15044-s001.pdf [file ijms-15-15044-s001.pdf]

## Supplementary Information

**Figure S1.** Optimization of hAD-MSCs and fibroblasts transfection by microporation technique. hAD-MSCs and fibroblasts were transfected with 2  $\mu$ g of pLOC/ANGPT1/eGFP using a microporator. (A) After 48 h, the expression of eGFP was analyzed using fluorescence microscopy. Cells were microporated using seven different pulse conditions: (P1) 1000 V, 20 ms, one pulse; (P2) 1100 V, 20 ms, one pulse; (P3) 1200 V, 20 ms, one pulse; (P4), 1300 V, 20 ms, one pulse; (P5) 1400 V, 20 ms, one pulse; (P6) 1500 V, 20 ms, one pulse and (P7) 1600 V, 20 ms, one pulse. Scale bar = 100  $\mu$ m; (B) Cell viability were defined as a percentage of microporated cell per well relative to the total number of cells per well in control wells and the relative percentage was plotted as a function of pulse magnitude. The transfection score was maximized at a pulse magnitude of 1500 V for hAD-MSCs and 1400 V for fibroblasts and hence were identified as the optimum condition for hAD-MSCs and fibroblasts transfection.

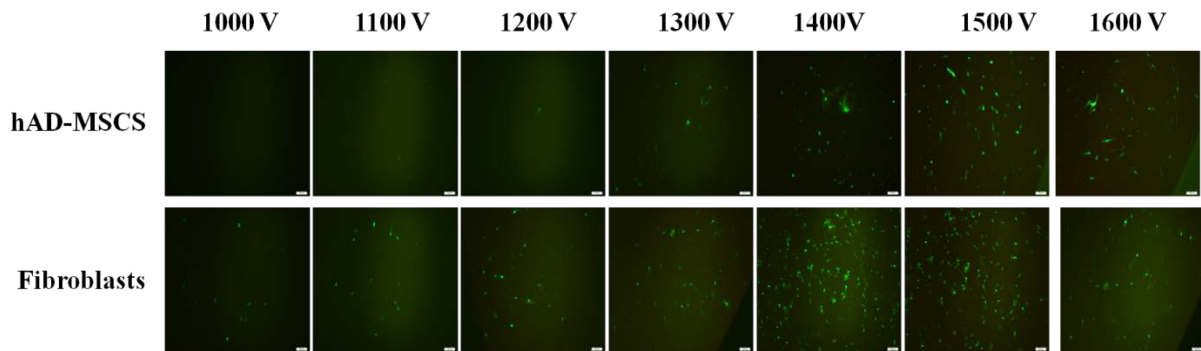

(A)

### Viability assay of microporated cells

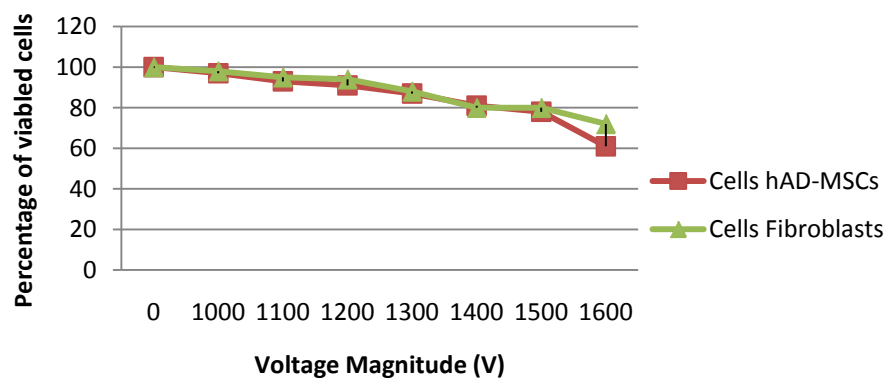

(B)

**Figure S2.** Determination of transfection efficiency by transfection reagents of different concentration of plasmid DNA into hAD-MSCs and fibroblasts. Cells were transfected with pLOC/ANGPT1/eGFP plasmid over a range of reagent/DNA ratios ( $v/w$ ) of (A) cationic polymer and (B) calcium phosphate precipitation techniques. The  $v/w$  ratios of Turbofect/DNA were: 6/2, 6/4, 6/6, 6/8 and 6/10. While the  $v/w$  ratios of  $\text{CaCl}_2/\text{BBS}/\text{DNA}$  were: 1/1/2, 1/1/4, 1/1/6, 1/1/8 and 1/1/10 respectively as described in Materials and Methods. The expression level of eGFP was analyzed using fluorescence microscopy; Cell viability was defined as a percentage of transfected cell per well relative to the total number of cells per well in control wells (C) and (D). For fibroblasts the highest transfection efficiency was obtained at  $v/w$  ratio of 6/10 for cationic polymer and 1/1/10 for calcium phosphate precipitation. Scale bar = 100  $\mu\text{m}$ .

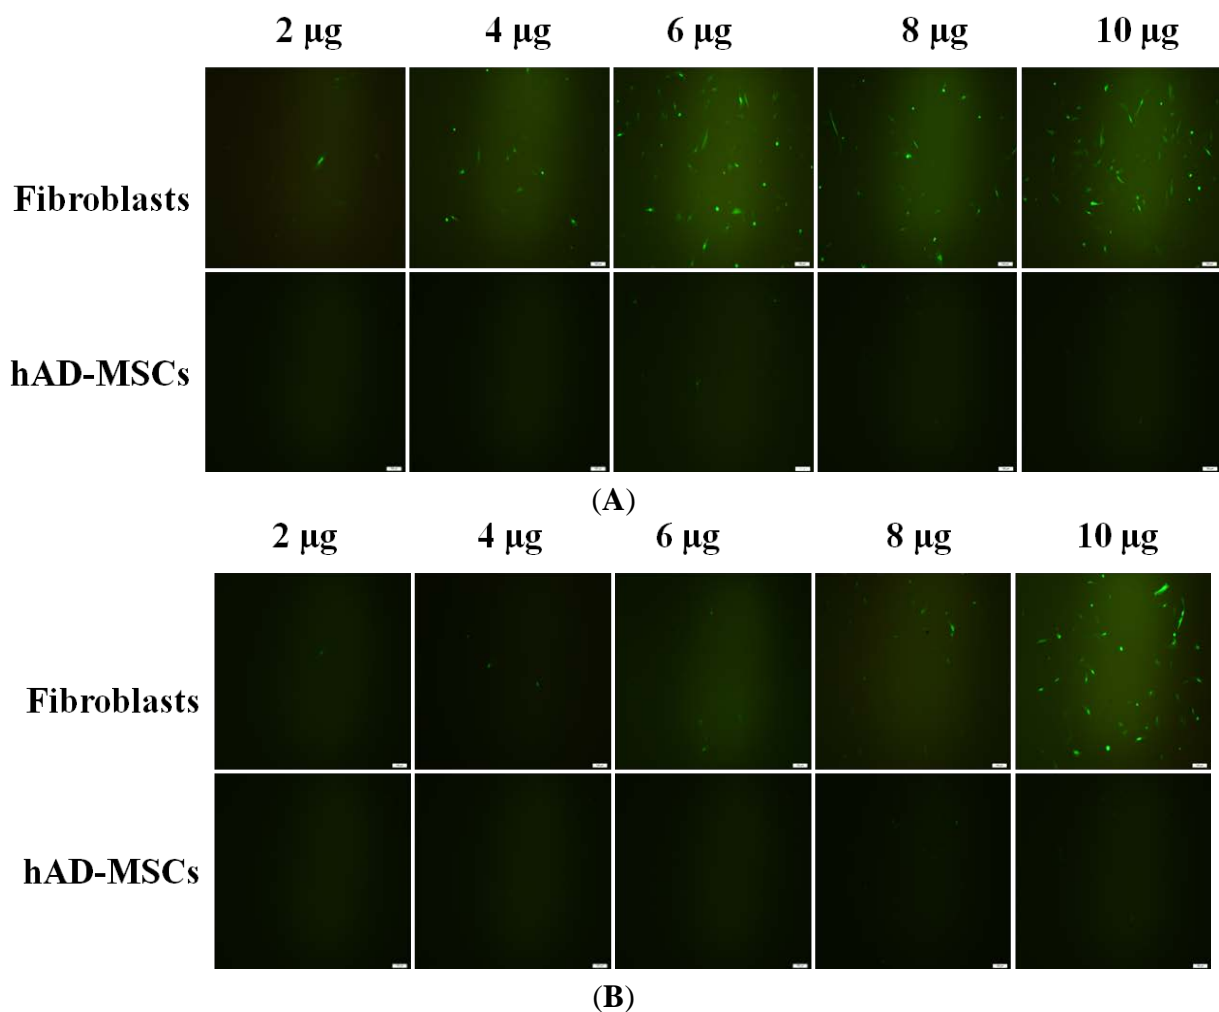

Figure S2. *Cont.***Viability assay of cationic polymer-transfected cells**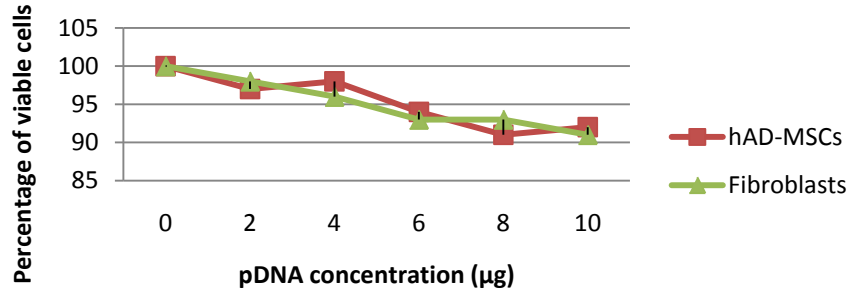

(C)

**Viability assay of calcium phosphate-transfected cells**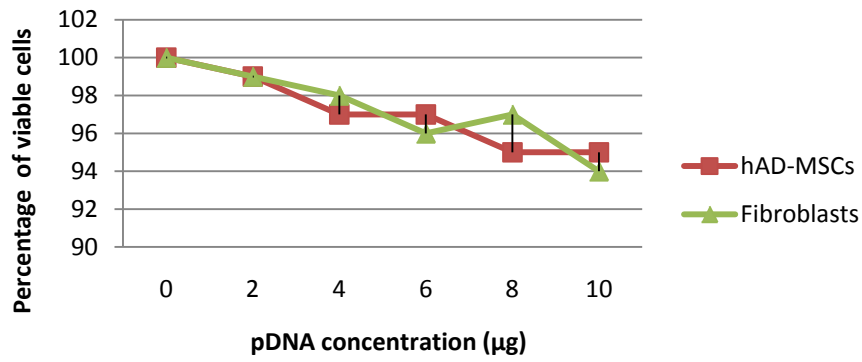

(D)

**Figure S3.** Optimization of hAD-MSCs and fibroblasts transfection by standard electroporation technique. hAD-MSCs and fibroblasts were transfected with 10  $\mu\text{g}$  of pLOC/ANGPT1/eGFP using a Gene Pulser Xcell electroporation system. (A) After 48 h, the expression of eGFP was analyzed using fluorescence microscopy. Cells were electroporated using square wave mode with pulse magnitude was varied from 80–120 V and the pulse duration (ms) and frequency (pulse number) were held constant at 20 ms and 1 per transfection. Scale bar = 100  $\mu\text{m}$ ; (B) Cell viability were defined as a percentage of electroporated cell per well relative to the total number of cells per well in control wells and the relative percentage was plotted as a function of pulse magnitude. The transfection efficiency was maximized at a pulse magnitude of 120 V for both cells.

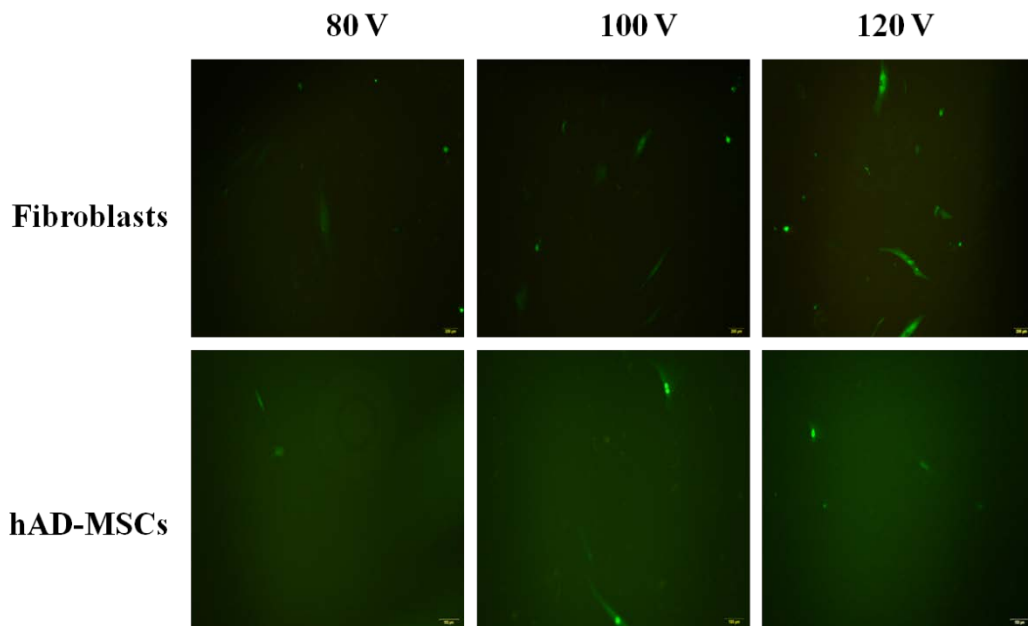

(A)

### Viability test of electroporated - cells

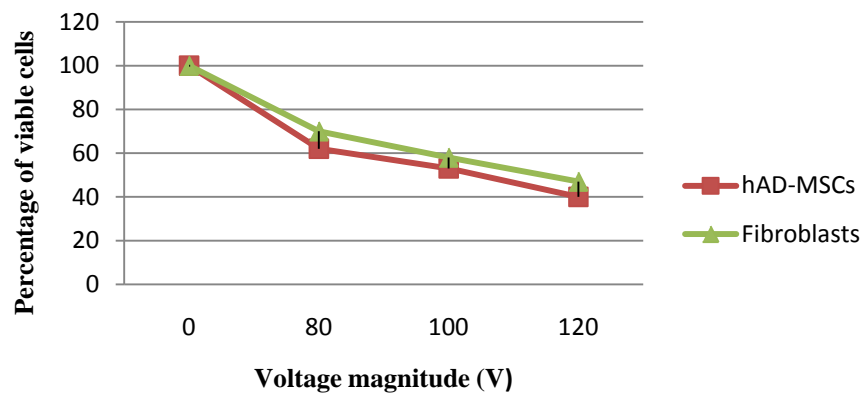

(B)
